# Supplementary material for: The Influence of Film and Storage on the Phenolic and Antioxidant Properties of Red Raspberries (Rubus idaeus L.) cv. Erika
Source: MDPI journal article supplement (doi:10.3390/antiox8080254), 2019-07-30
Supplement: s1 [file s1]

### **Determination of Total Phenolic Content (TPC)**

Preparation of the blank. One mL of Folin-Ciocalteu was mixed with 5 mL of deionised water. After 8 minutes, 10 mL of sodium carbonate was added, then it was brought to volume with deionised water to 25 mL. The calibration curve was made with gallic acid in these concentrations: 0.8, 2.0, 4.0, 8.0 and 10.0 mg/L.

The concentration of the sample was expressed in mg/100g of fruit, and is given by the following formula:

$$((C \times DF \times mg) / g) \times 100$$

Where: **C** is the concentration of the sample; **DF** is the dilution factor of 25; **mg** indicates milligrams of the initial sample and **g** are the grams of the fruit used.

### **Determination of total monomeric anthocyanin content (TMAC).**

Preparation of buffer solutions. (a) Buffer pH 1.0 with potassium chloride, 0.025 M. Obtained by weighing 1.86 g of KCl in a beaker and adding 980 mL of deionised water. The pH was measured and was stabilised at  $\text{pH } 1.0 \pm 0.05$  with HCl (about 6.3 mL) and made up to volume in a 1 L volumetric flask with deionised water. (b) Buffer pH 4.5 with 0.4 M sodium acetate Obtained by weighing 54.43 g of  $\text{CH}_3\text{CO}_2\text{Na} \cdot 3\text{H}_2\text{O}$  in a beaker and adding 960 mL of deionised water. The pH was measured and regularised at  $\text{pH } 4.5 \pm 0.05$  with HCl (about 20 mL) and made up to volume in a volumetric flask with deionised water 1L.
